# Supplementary material
Source: publisher figshare collection journal article supplement (https://acs.figshare.com/ndownloader/files/3748117)
Supplement: Supplementary file 1 [file 3748117]

# Supporting Information

## **Atomic to Nanoscale Investigation of Functionalities of Al<sub>2</sub>O<sub>3</sub> Coating Layer on Cathode for Enhanced Battery Performance**

Pengfei Yan<sup>1</sup>, Jianming Zheng<sup>2</sup>, Xiaofeng Zhang<sup>3</sup>, Rui Xu<sup>3</sup>, Khalil Amine<sup>3</sup>, Jie Xiao<sup>2</sup>, Ji-Guang Zhang<sup>2</sup>, Chong-Min Wang<sup>1\*</sup>

<sup>1</sup>Environmental Molecular Sciences Laboratory, Pacific Northwest National Laboratory, 902 Battelle Boulevard, Richland, WA 99352, USA

<sup>2</sup>Energy and Environmental Directorate, Pacific Northwest National Laboratory, 902 Battelle Boulevard, Richland, WA 99352, USA

<sup>3</sup>Chemical Sciences and Engineering Division, Argonne National Laboratory, 9700 South Cass Avenue, Argonne, IL 60439, USA

### **Corresponding Author**

\*(C.-M.W.) E-mail: [Chongmin.wang@pnnl.gov](mailto:Chongmin.wang@pnnl.gov)

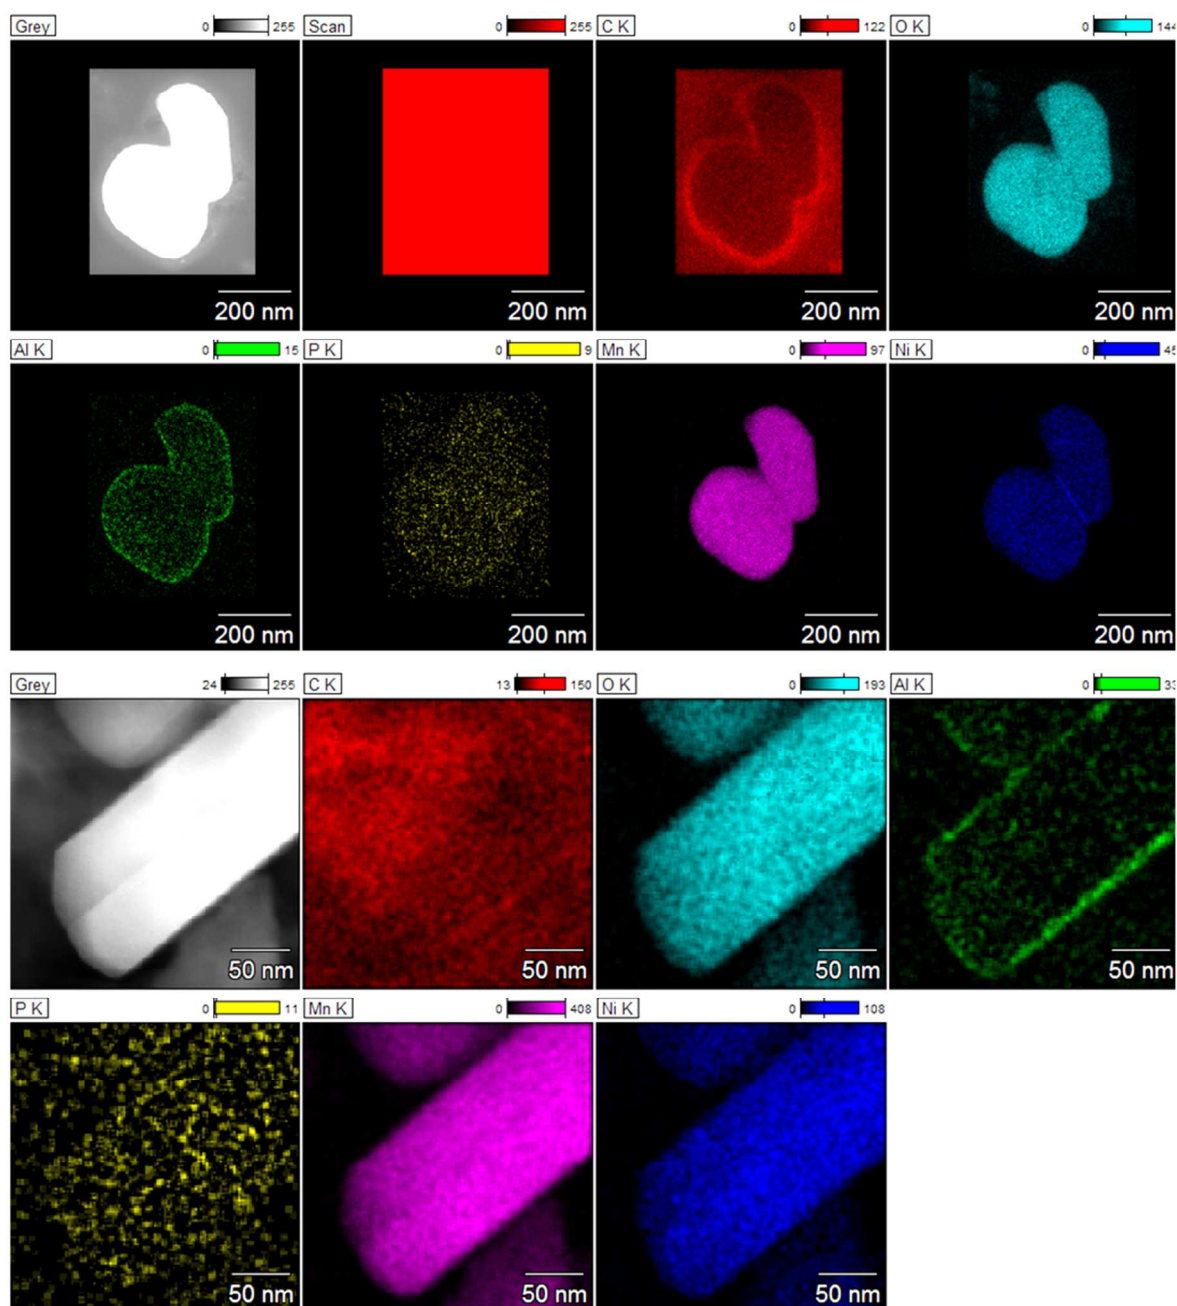

Figure S1 STEM-EDS mapping on coated samples after 40 cycles, showing negligible phosphorus surface enrichment.

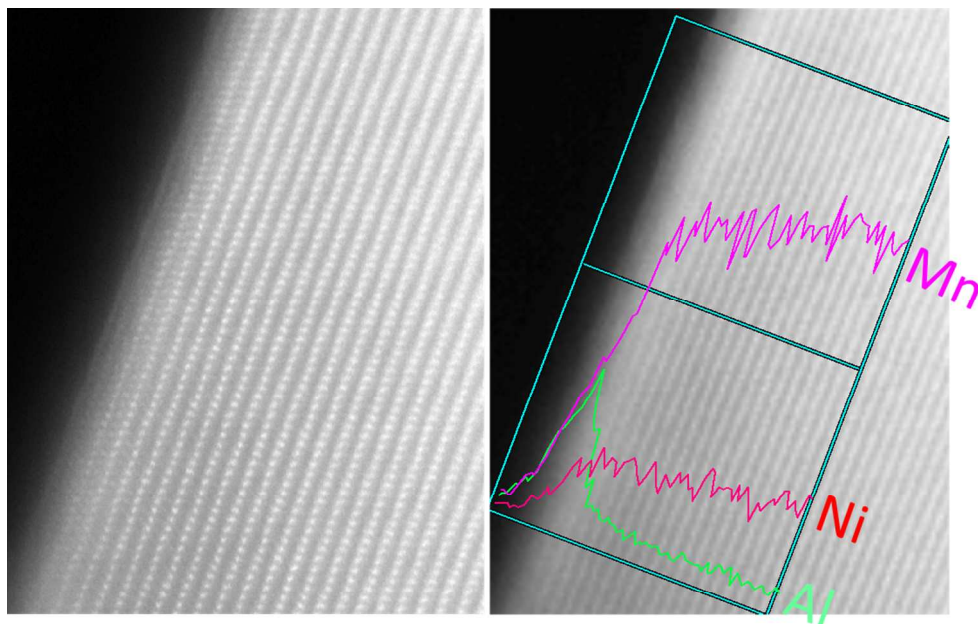

Figure S2 STEM-HAADF image and its corresponding EDS line scan.
